# Supplementary material for: Are Common Sense Model constructs and self-efficacy simultaneously correlated with self-management behaviors and health outcomes: A systematic review
Source: PubMed Central journal article supplement — Health Psychol Open. 2020 Jan 23;7(1):2055102919898846. doi: 10.1177/2055102919898846 (PMC6978827; doi:10.1177/2055102919898846), 2020-01-23
Supplement: Supplement_1_12-6-19_FINAL_1.pdf [file Supplement_1_12-6-19_FINAL_1.pdf]

### Supplement 1. Articles Included in Review

Note: 79% of studies published between 2012 and 2019

Al-Noumani, H., Wu, J. R., Barksdale, D., Alkhasawneh, E., Knafl, G., & Sherwood, G. (2017). Relationship Between Medication Adherence and Health Beliefs Among Patients with Hypertension in Oman: Pilot study. *Sultan Qaboos University Medical Journal*, *17*(3), e329-e333.

doi:<https://dx.doi.org/10.18295/squmj.2017.17.03.012>

Bishop, F. L., Yardley, L., Prescott, P., Cooper, C., Little, P., & Lewith, G. T. (2015). Psychological Covariates of Longitudinal Changes in Back-related Disability in Patients Undergoing Acupuncture. *Clinical Journal of Pain*, *31*(3), 254-264. doi:10.1097/ajp.000000000000108

Campbell, P., Foster, N. E., Thomas, E., & Dunn, K. M. (2013). Prognostic indicators of low back pain in primary care: Five-year prospective study. *The Journal of Pain*, *14*(8), 873-883.

doi:10.1016/j.jpain.2013.03.013

Chou, F.-Y. (2019). Cancer Illness Perception and Self-Management of Chinese Patients. *Asia Pac J Oncol Nurs*, *6*(1), 57-63. doi:10.4103/apjon.apjon\_56\_18

Ford, S., Howard, R., & Oyeboode, J. (2012). Psychosocial aspects of coeliac disease: a cross-sectional survey of a UK population. *British Journal of Health Psychology*, *17*(4), 743-757.

doi:10.1111/j.2044-8287.2012.02069.x

Foster, N. E., Thomas, E., Bishop, A., Dunn, K. M., & Main, C. J. (2010). Distinctiveness of psychological obstacles to recovery in low back pain patients in primary care. *Pain*, *148*(3), 398-406.

doi:10.1016/j.pain.2009.11.002

Gandy, M., Sharpe, L., Perry, K. N., Miller, L., Thayer, Z., Boserio, J., & Mohamed, A. (2013). The psychosocial correlates of depressive disorders and suicide risk in people with epilepsy. *Journal of Psychosomatic Research*, *74*(3), 227-232. doi:10.1016/j.jpsychores.2012.11.001

- Gandy, M., Sharpe, L., Perry, K. N., Miller, L., Thayer, Z., Boserio, J., & Mohamed, A. (2015). Anxiety in epilepsy: A neglected disorder. *Journal of Psychosomatic Research, 78*(2), 149-155.  
doi:doi:10.1016/j.jpsychores.2014.12.002
- Glattacker, M., Heyduck, K., & Jakob, T. (2018). Yellow flags as predictors of rehabilitation outcome in chronic low back pain. *Rehabilitation psychology, 63*(3), 408-417.  
doi:<http://dx.doi.org/10.1037/rep0000200>
- Greco, A., Steca, P., Pozzi, R., Monzani, D., D'Addario, M., Villani, A., . . . Parati, G. (2014). Predicting Depression from Illness Severity in Cardiovascular Disease Patients: Self-efficacy Beliefs, Illness Perception, and Perceived Social Support as Mediators. *International Journal of Behavioral Medicine, 21*(2), 221-229. doi:10.1007/s12529-013-9290-5
- Greco, A., Steca, P., Pozzi, R., Monzani, D., Malfatto, G., & Parati, G. (2015). The Influence of Illness Severity on Health Satisfaction in Patients with Cardiovascular Disease: The Mediating Role of Illness Perception and Self-Efficacy Beliefs. *Behavioral Medicine, 41*(1), 9-17.  
doi:10.1080/08964289.2013.855159
- Green, H. J., Steinnagel, G., Morris, C., & Laakso, E. L. (2014). Health behaviour models and patient preferences regarding nutrition and physical activity after breast or prostate cancer diagnosis. *European Journal of Cancer Care, 23*(5), 640-652. doi:10.1111/ecc.12190
- Houle, J., Lauzier-Jobin, F., Beaulieu, M. D., Meunier, S., Coulombe, S., Cote, J., . . . Lambert, J. (2016). Socioeconomic status and glycemic control in adult patients with type 2 diabetes: a mediation analysis. *BMJ Open Diabetes Res Care, 4*(1), e000184. doi:10.1136/bmjdr-2015-000184
- Johansson, A. C., Brink, E., Cliffordson, C., & Axelsson, M. (2018). The function of fatigue and illness perceptions as mediators between self-efficacy and health-related quality of life during the first year after surgery in persons treated for colorectal cancer. *Journal of Clinical Nursing, 27*(7-8), e1537-e1548. doi:<https://dx.doi.org/10.1111/jocn.14300>

Knowles, S. R., Nelson, E. A., Castle, D. J., Salzberg, M. R., Choong, P. F. M., & Dowsey, M. M. (2016).

Using the common sense model of illness to examine interrelationships between symptom severity and health outcomes in end-stage osteoarthritis patients. *Rheumatology*, *55*(6), 1066-1073. doi:10.1093/rheumatology/kew022

Knowles, S. R., Tribbick, D., Connell, W. R., Castle, D., Salzberg, M., & Kamm, M. A. (2017). Exploration of

Health Status, Illness Perceptions, Coping Strategies, Psychological Morbidity, and Quality of Life in Individuals With Fecal Ostomies. *Journal of Wound, Ostomy and Continence Nursing*, *44*(1), 69-73. doi:10.1097/won.0000000000000295

La, I. S., & Yun, E. K. (2017). Effects of stress appraisal on the quality of life of adult patients with

multiple myeloma and their primary family caregivers in Korea. *Psycho-oncology*, *26*(10), 1640-1646. doi:10.1002/pon.4348

Mann, D. M., Ponieman, D., Leventhal, H., & Halm, E. A. (2009). Predictors of adherence to diabetes

medications: The role of disease and medication beliefs. *Journal of Behavioral Medicine*, *32*(3), 278-284. doi:10.1007/s10865-009-9202-y

Massey, E. K., Tielen, M., Laging, M., Timman, R., Beck, D. K., Khemai, R., . . . Weimar, W. (2015).

Discrepancies Between Beliefs and Behavior: A Prospective Study Into Immunosuppressive Medication Adherence After Kidney Transplantation. *Transplantation*, *99*(2), 375-380. doi:10.1097/tp.0000000000000608

Meinema, J. G., van Dijk, N., Beune, E. J. A. J., Jaarsma, D. A. D. C., van Weert, H. C. P. M., & Haafkens, J.

A. (2015). Determinants of adherence to treatment in hypertensive patients of African descent and the role of culturally appropriate education. *PLoS One*, *10*(8), e0133560.

doi:10.1371/journal.pone.0133560

- Platt, I., Green, H. J., Jayasinghe, R., & Morrissey, S. A. (2014). Understanding adherence in patients with coronary heart disease: Illness representations and readiness to engage in healthy behaviours. *Australian Psychologist, 49*(2), 127-137. doi:10.1111/ap.12038
- Steca, P., Greco, A., D'Addario, M., Monzani, D., Pozzi, R., Villani, A., . . . Parati, G. (2013a). Relationship of illness severity with health and life satisfaction in patients with cardiovascular disease: The mediating role of self-efficacy beliefs and illness perceptions. *Journal of Happiness Studies, 14*(5), 1585-1599. doi:10.1007/s10902-012-9397-4
- Steca, P., Greco, A., Monzani, D., Politi, A., Gestra, R., Ferrari, G., . . . Parati, G. (2013). How does illness severity influence depression, health satisfaction and life satisfaction in patients with cardiovascular disease? The mediating role of illness perception and self-efficacy beliefs. *Psychology & Health, 28*(7), 765-783. doi:10.1080/08870446.2012.759223
- Tahmasebi, R., Noroozi, A., & Tavafian, S. S. (2015). Determinants of Self-Management Among Diabetic Patients: A Path Analysis. *Asia-Pacific Journal of Public Health, 27*(2), NP524-NP534. doi:10.1177/1010539513475652
- Theunissen, N. C. M., de Ridder, D. T. D., Bensing, J. M., & Rutten, G. E. H. M. (2003). Manipulation of patient-provider interaction: Discussing illness representations or action plans concerning adherence. *Patient Education and Counseling, 51*(3), 247-258. doi:10.1016/S0738-3991(02)00224-0
- Treharne, G. J., Lyons, A. C., Hale, E. D., Douglas, K. M. J., Goodchild, C. E., Booth, D. A., & Kitas, G. D. (2007). Sleep disruption frequency in rheumatoid arthritis: perceived stress predicts poor outcome over one year. *Musculoskeletal care, 5*(1), 51-64. doi:10.1002/msc.99
- Treharne, G. J., Lyons, A. C., Hale, E. D., Goodchild, C. E., Booth, D. A., & Kitas, G. D. (2008). Predictors of fatigue over 1 year among people with rheumatoid arthritis. *Psychology, Health & Medicine, 13*(4), 494-504. doi:10.1080/13548500701796931

Unni, E., & Farris, K. B. (2011). Determinants of different types of medication non-adherence in cholesterol lowering and asthma maintenance medications: A theoretical approach. *Patient Education and Counseling*, 83(3), 382-390. doi:10.1016/j.pec.2011.02.017

Zelber-Sagi, S., Bord, S., Dror-Lavi, G., Smith, M. L., Towne, S. D., Buch, A., . . . Shibolet, O. (2017). Role of illness perception and self-efficacy in lifestyle modification among non-alcoholic fatty liver disease patients. *World Journal of Gastroenterology*, 23(10), 1881-1890. doi:10.3748/wjg.v23.i10.1881
