# Supplementary material for: Are Common Sense Model constructs and self-efficacy simultaneously correlated with self-management behaviors and health outcomes: A systematic review
Source: PubMed Central journal article supplement — Health Psychol Open. 2020 Jan 23;7(1):2055102919898846. doi: 10.1177/2055102919898846 (PMC6978827; doi:10.1177/2055102919898846), 2020-01-23
Supplement: Supplement_2_FINAL_Dec2019_FINAL.pdf [file Supplement_2_FINAL_Dec2019_FINAL.pdf]

## Supplement 2: Search Strategy for Each Database

**Note:** Ns for each search include duplicates across searches.

**For initial search on June 23, 2017**

### PubMed

Creating in advanced search using all fields

N=101

((("social cognitive theory") OR "self efficacy") OR "self-efficacy")) AND (((("common sense model") OR "illness perception\*") OR "illness representation\*") OR "illness belief\*") OR "treatment representation\*")

### Medline

Advanced Search, map to subject heading unchecked

N=111

((("social cognitive theory" or "self efficacy" or "self-efficacy") and ("common sense model" or "illness perception\*" or "illness representation\*" or "illness belief\*" or "treatment representation\*")).mp.

### PsycInfo

Advanced Search, map to subject heading unchecked

N=126

((("social cognitive theory" or "self efficacy" or "self-efficacy") and ("common sense model" or "illness perception\*" or "illness representation\*" or "illness belief\*" or "treatment representation\*")).mp.

### CINAHL

Using advanced search, all text

N=67

TX (((("social cognitive theory") OR "self efficacy") OR "self-efficacy")) AND (((("common sense model") OR "illness perception\*") OR "illness representation\*") OR "illness belief\*") OR "treatment representation\*")

### Web of Science

Entered into basic search

N=120

TOPIC: (((("social cognitive theory") OR "self efficacy") OR "self-efficacy")) AND (((("common sense model") OR "illness perception\*") OR "illness representation\*") OR "illness belief\*") OR "treatment representation\*") Timespan: All years. Indexes: SCI-EXPANDED.

**For updated search on April 10, 2019**

**PubMed**

Creating in advanced search using all fields

N=19

((("social cognitive theory") OR "self efficacy") OR "self-efficacy")) AND (((("common sense model") OR "illness perception\*") OR "illness representation\*") OR "illness belief\*") OR "treatment representation\*") Limited to 6/23/17 to present.

**Medline**

Advanced Search, map to subject heading unchecked

N=22

("social cognitive theory" or "self efficacy" or "self-efficacy") and ("common sense model" or "illness perception\*" or "illness representation\*" or "illness belief\*" or "treatment representation\*").mp.  
Limited to 2017-current

**PsycInfo**

Advanced Search, map to subject heading unchecked

N=24

("social cognitive theory" or "self efficacy" or "self-efficacy") and ("common sense model" or "illness perception\*" or "illness representation\*" or "illness belief\*" or "treatment representation\*").mp.  
Limited to 2017-current

**CINAHL** Using advanced search, all text

N=22

TX (((("social cognitive theory") OR "self efficacy") OR "self-efficacy")) AND (((("common sense model") OR "illness perception\*") OR "illness representation\*") OR "illness belief\*") OR "treatment representation\*") Limited to June 2017 – April 2019

**Web of Science**

Entered into basic search

N=32

TOPIC: (((("social cognitive theory") OR "self efficacy") OR "self-efficacy")) AND (((("common sense model") OR "illness perception\*") OR "illness representation\*") OR "illness belief\*") OR "treatment representation\*") Timespan: All years. Indexes: SCI-EXPANDED. Limited to 2017 - 2019
